# Supplementary material for: α2,6-Sialylation is Upregulated in Severe COVID-19 Implicating the Complement Cascade
Source: bioRxiv or medRxiv preprint supplement (doi:10.1101/2022.06.06.22275981), 2022-06-08
Supplement: Supplementary file [file media-1.pdf]

# Supplementary Information

## **$\alpha$ 2,6-Sialylation is Upregulated in Severe COVID-19 Implicating the Complement Cascade**

Rui Qin<sup>1‡</sup>, Emma Kurz<sup>2‡</sup>, Shuhui Chen<sup>3‡</sup>, Briana Zeck<sup>4</sup>, Luis Chiribogas<sup>4</sup>, Dana Jackson<sup>5</sup>, Alex Herchen<sup>5</sup>, Tyson Attia<sup>5</sup>, Michael Carlock<sup>6</sup>, Amy Rapkiewicz<sup>7</sup>, Dafna Bar-Sagi<sup>8</sup>, Bruce Ritchie<sup>4</sup>, Ted M. Ross<sup>6</sup>, Lara K. Mahal<sup>1\*</sup>

<sup>1</sup> Department of Chemistry, University of Alberta, Edmonton, Alberta, Canada

<sup>2</sup> Department of Cell Biology, NYU Grossman School of Medicine, 550 1st Avenue, New York, New York, USA

<sup>3</sup> Department of Chemistry, Biomedical Research Institute, New York University, New York, New York, USA

<sup>4</sup> Center for Biospecimen Research and Development, NYU Langone, New York, New York, USA

<sup>5</sup> University of Alberta Hospital, Edmonton, Alberta, Canada

<sup>6</sup> Center for Vaccines and Immunology, University of Georgia, Athens, Georgia, USA

<sup>7</sup> Department of Pathology, NYU Long Island School of Medicine, Mineola, NY, USA

<sup>8</sup> Department of Biochemistry and Molecular Pharmacology, NYU Grossman School of Medicine, New York, New York, USA

---

\*Corresponding author. Email: [lkmahal@ualberta.ca](mailto:lkmahal@ualberta.ca)

‡ Co-first authorship.

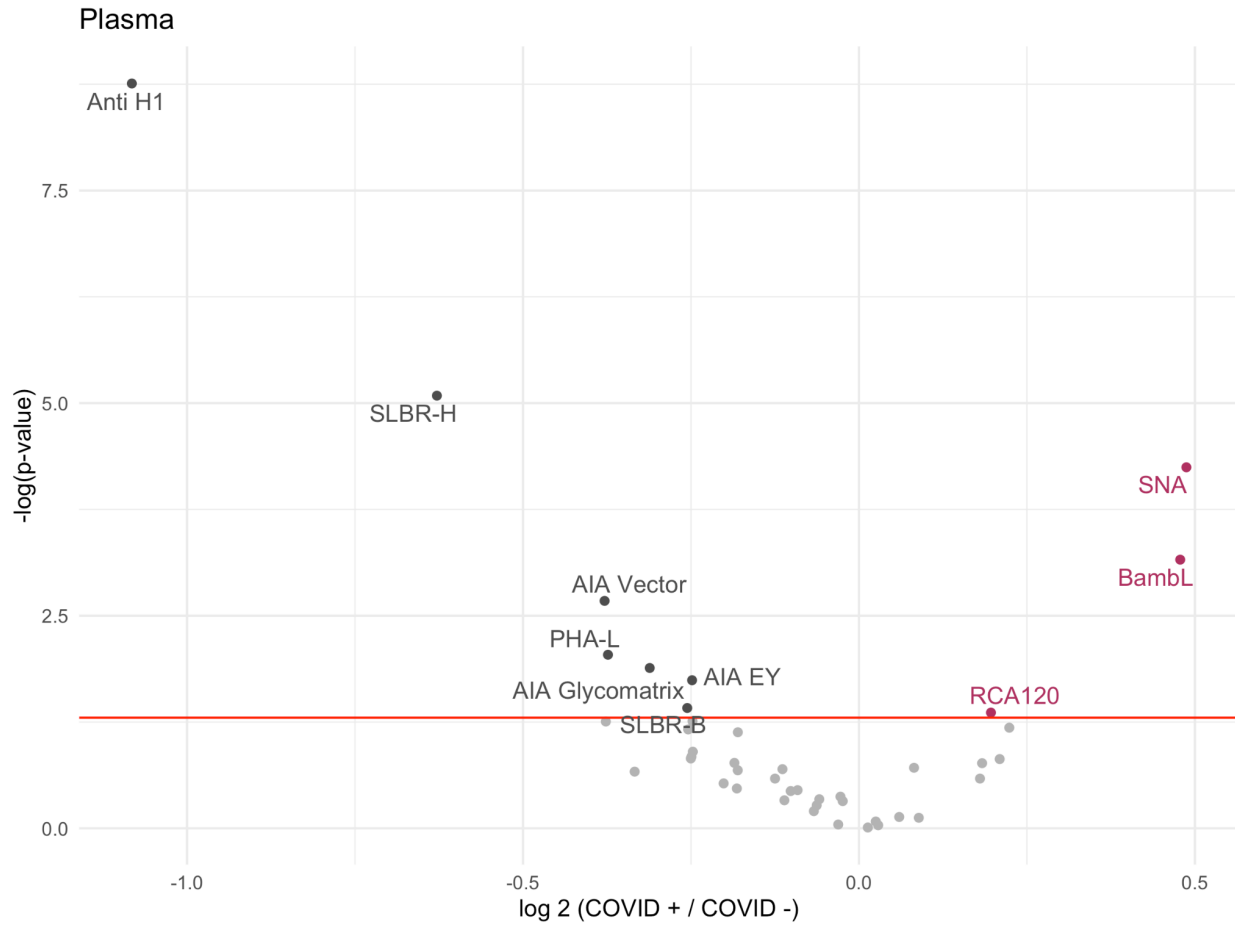

**Supplementary Figure 1. Volcano plot comparing lectin microarray data for COVID-19 positive patients (n = 71) and negative controls (n = 60).** Probes whose binding is statistically significantly decreased in the COVID-19 cohort when compared to controls are on the left of the volcano plot (dark grey). Probes whose binding is increased are on the right (maroon). The red line indicates  $p < 0.05$  by the Mann–Whitney U test.

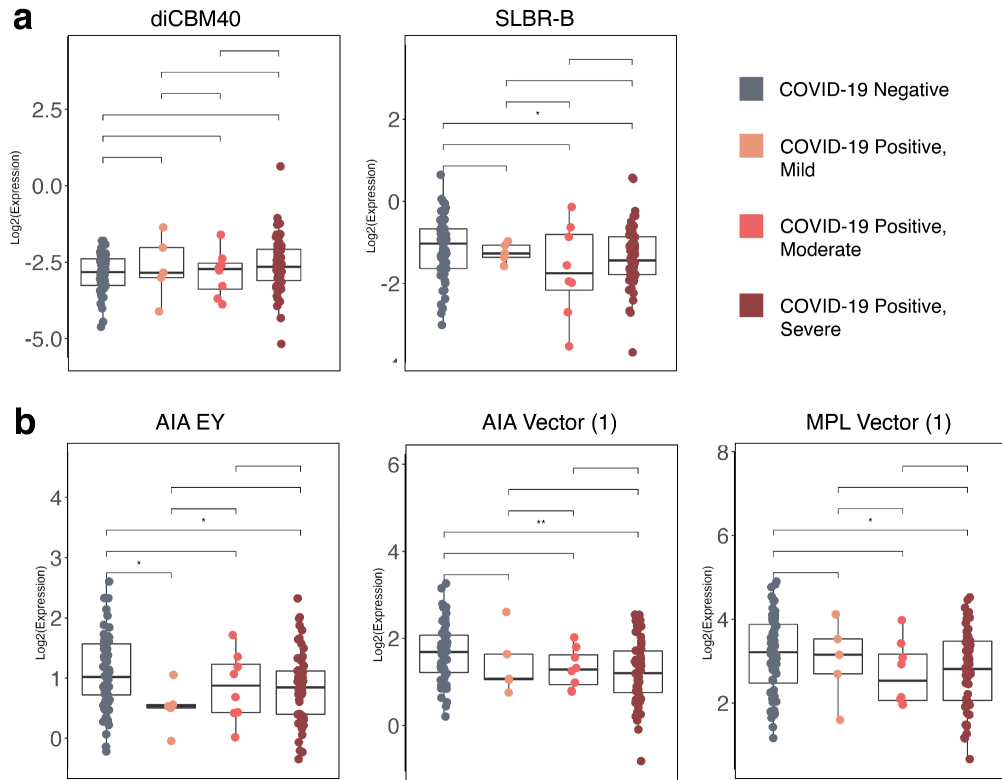

**Supplementary Figure 2: Boxplot analysis of (a)  $\alpha$ -2,3-sialic acid binding lectins and (b) core 1/3 O-glycan binding lectins between patient groups. Mann-Whitney U test was used to determine  $p$  values. \*:  $p < 0.05$ ; \*\*:  $p < 0.01$ .**

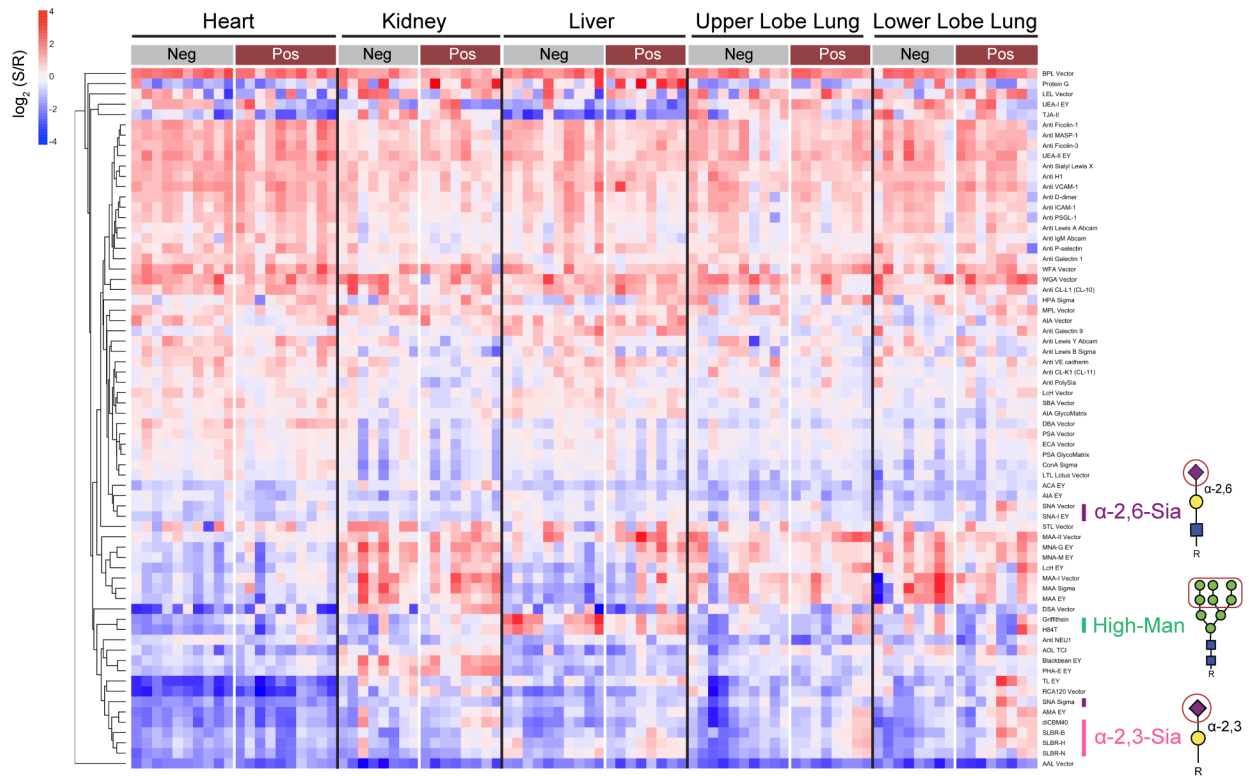

**Supplementary Figure 3. Multi-organ glycomic analysis of COVID-19 deceased patients.** Heatmap of lectin microarray data with the complete list of lectins. Samples from organs of patients who died of COVID (heart: n=5; kidney: n=4; liver: n=4; upper lobe lung: n=4; lower lobe lung: n=4, 2 samples per patient) or other causes (heart: n=5; kidney: n=4; liver: n=5; upper lobe lung: n=5; lower lobe lung: n=4, 2 samples per patient) were analyzed. Median normalized log<sub>2</sub> ratios (Sample (S)/Reference (R)) were ordered by organ and COVID status. Red, log<sub>2</sub>(S) > log<sub>2</sub>(R); blue, log<sub>2</sub>(R) > log<sub>2</sub>(S). Lectins binding α2,3-sialosides (pink), α2,6-sialosides (purple) and high-mannose (bright green) are highlighted to the right of the heatmap.

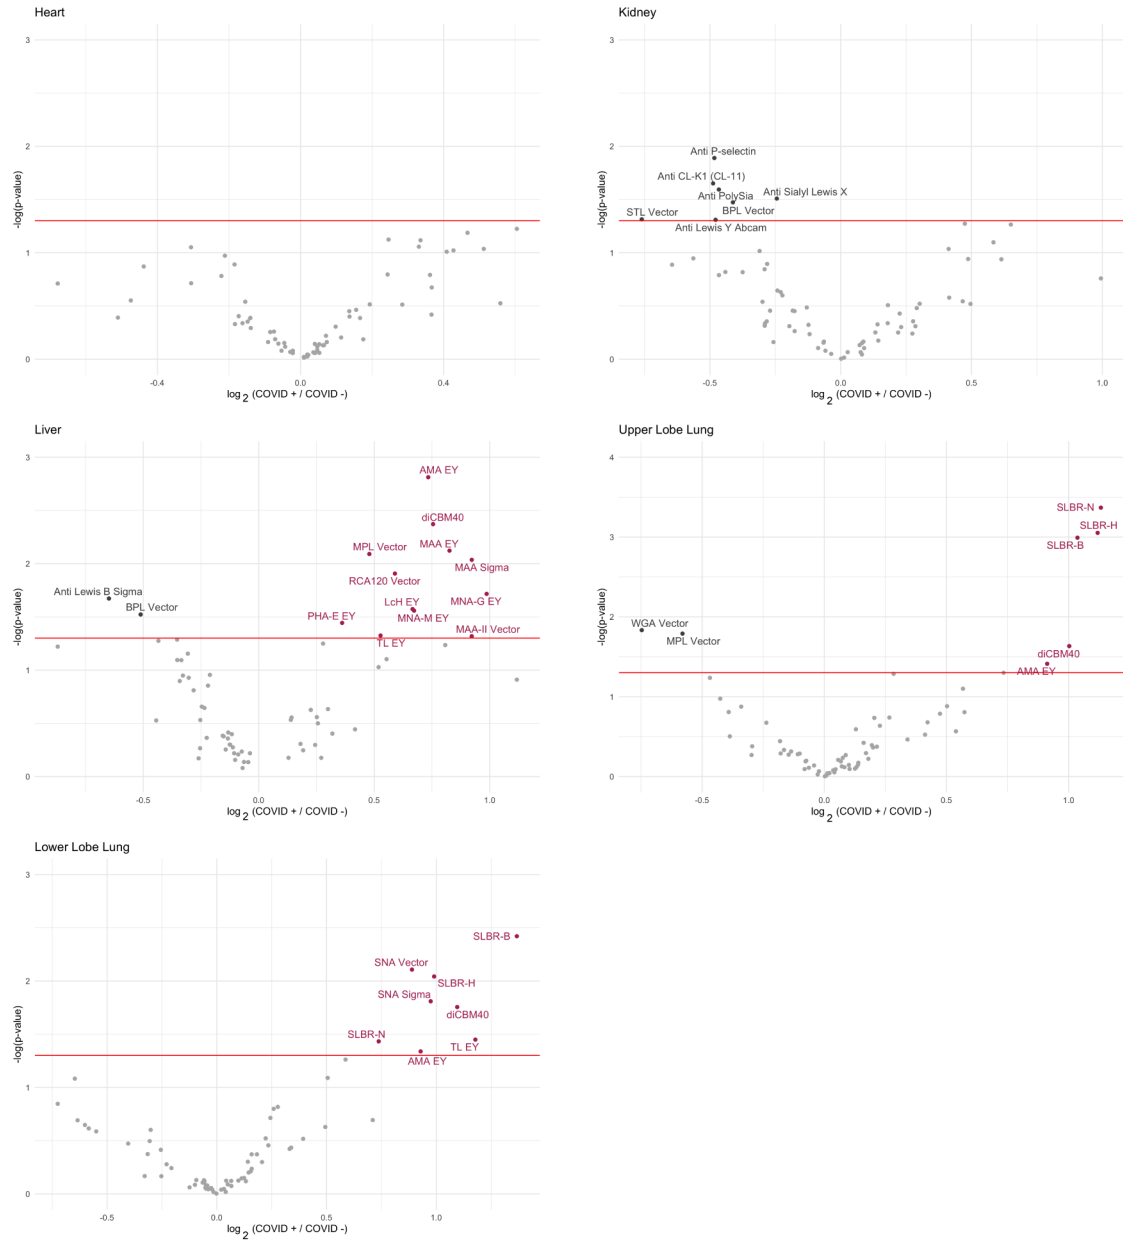

**Supplementary Figure 4. Volcano plot depicting glycan changes of individual organ of COVID-19 deceased patients.** Probes whose binding is statistically significantly decreased in the COVID-19 cohort when compared to controls are on the left of the volcano plot (dark grey). Probes whose binding is increased are on the right (maroon). The red line indicates  $p < 0.05$  by Student's t-test.

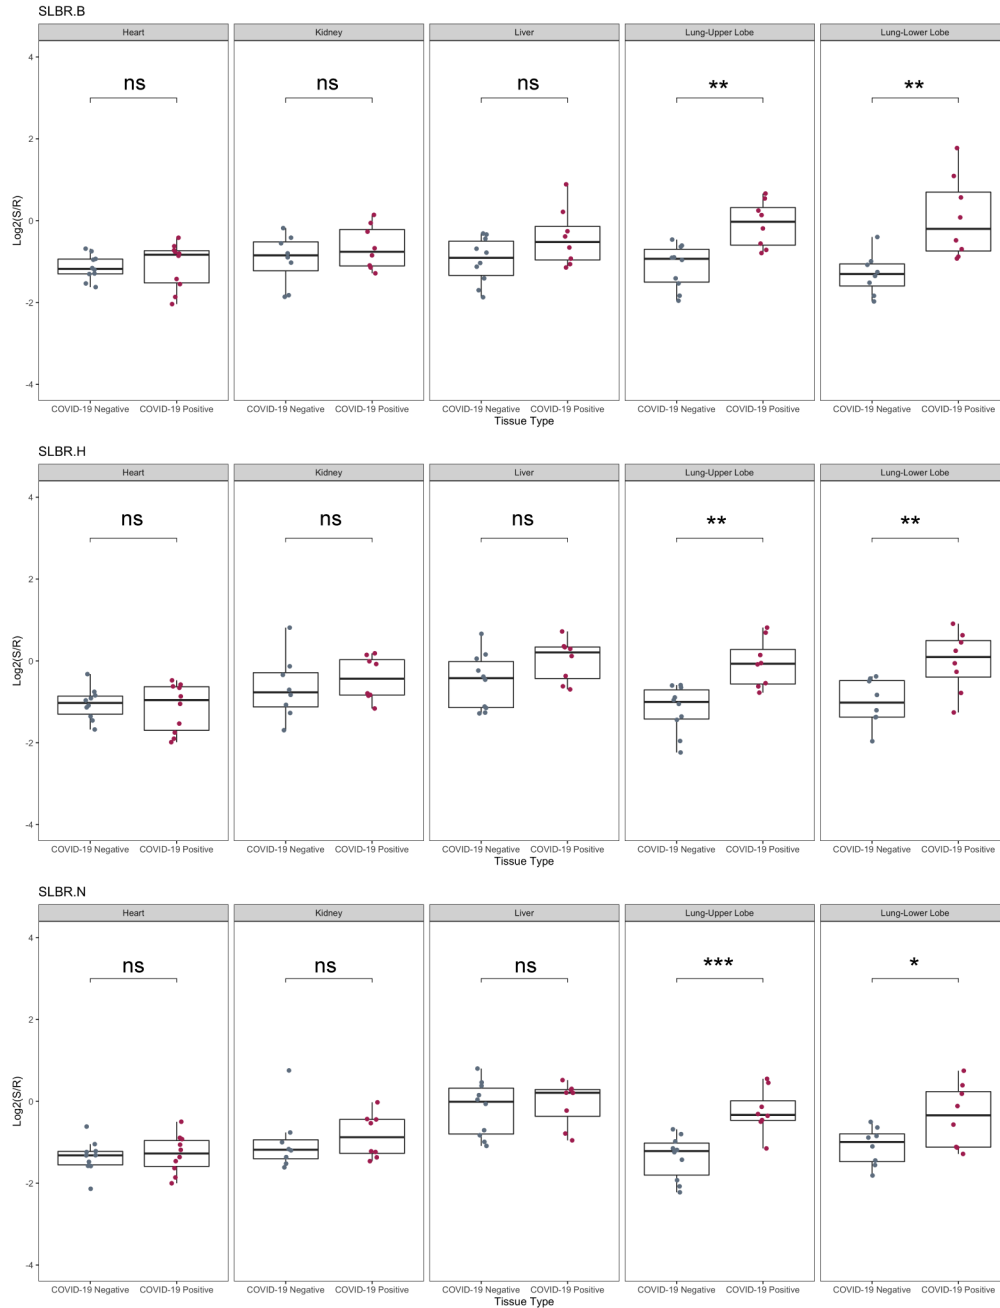

**Supplementary Figure 5. Boxplot analysis of  $\alpha$ 2,3-sialic acids by SLBR-B, SLBR-H, SLBR-N.** Organs (from left to right): heart, kidney, liver, upper lobe of lung and lower lobe of lung from patients deceased from COVID-19 (maroon), and from other incidents as negative controls (gray). P-value is derived from Student's t-test and red \* indicates  $p < 0.05$ .

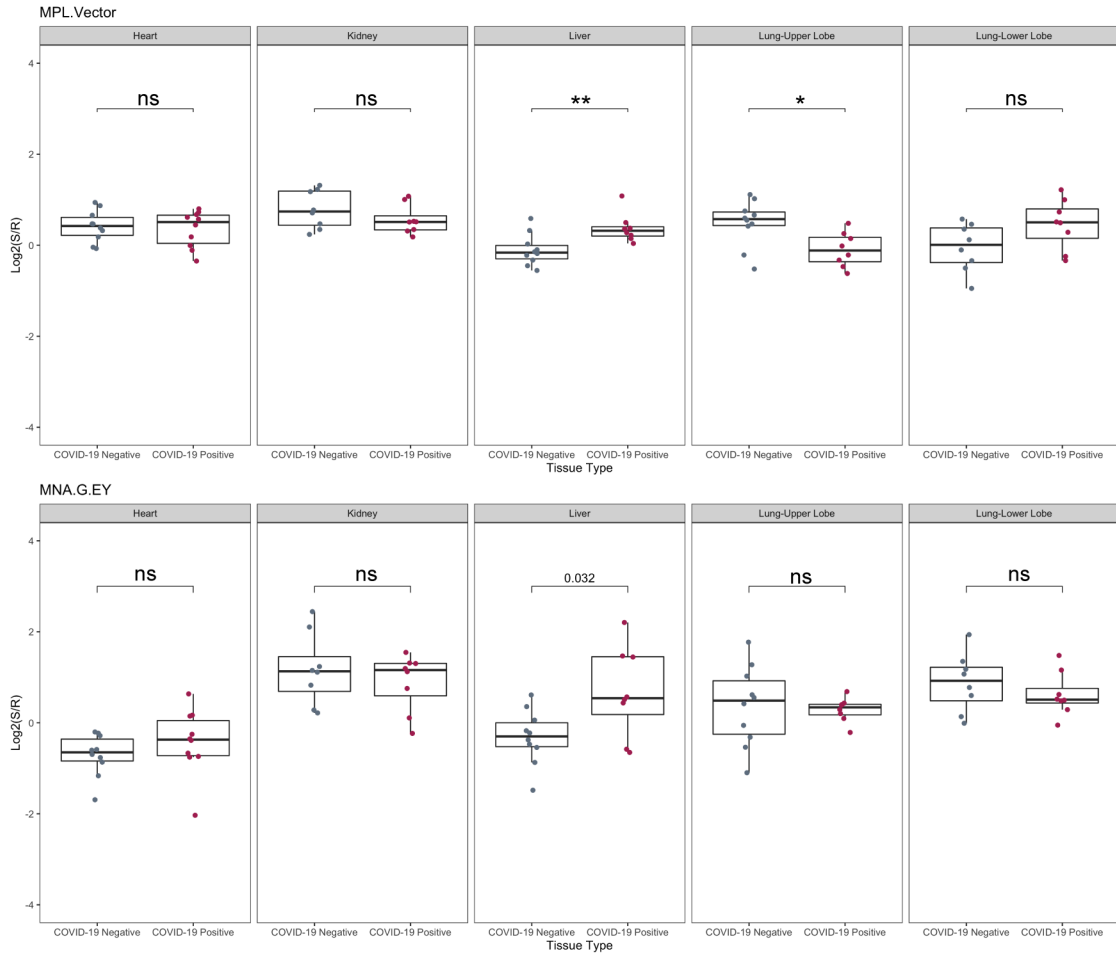

**Supplementary Figure 6. Boxplot analysis of core 1/3 O-linked glycans by MPL and MNA-G.** Organs (from left to right): heart, kidney, liver, upper lobe of lung and lower lobe of lung from patients deceased from COVID-19 (maroon), and from other incidents as negative controls (gray). P-value is derived from Student's t-test and red \* indicates  $p < 0.05$ .

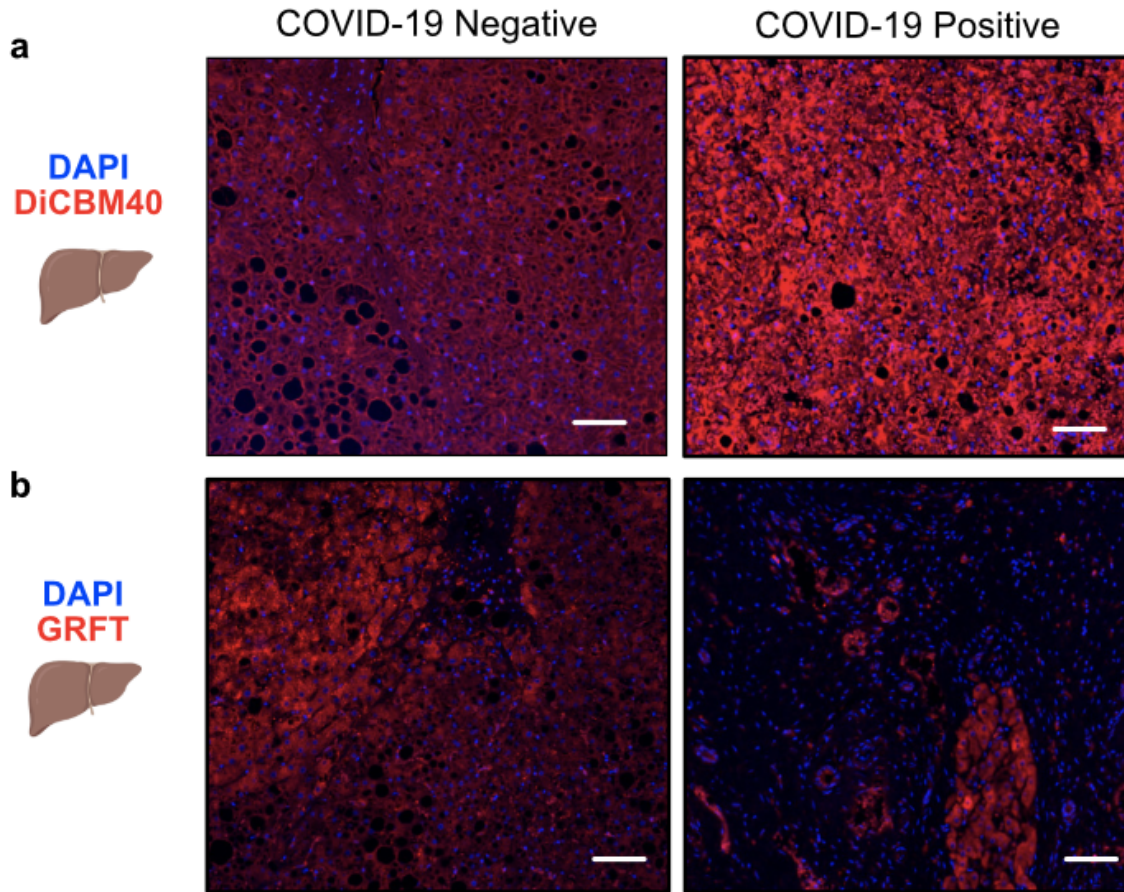

**Supplementary Figure 7. Expression of Select Lectins in COVID-19 Autopsy Livers.** (a) Representative images of IF staining against diCBM40 in the liver in COVID-19 negative (n = 2) or COVID-19 positive (n = 8) autopsy specimens. Scale bars represent 200  $\mu$ m. (b) Representative images of IF staining against GRFT in the liver in COVID-19 negative (n = 2) or COVID-19 positive (n = 8) autopsy specimens. Scale bars represent 200  $\mu$ m.



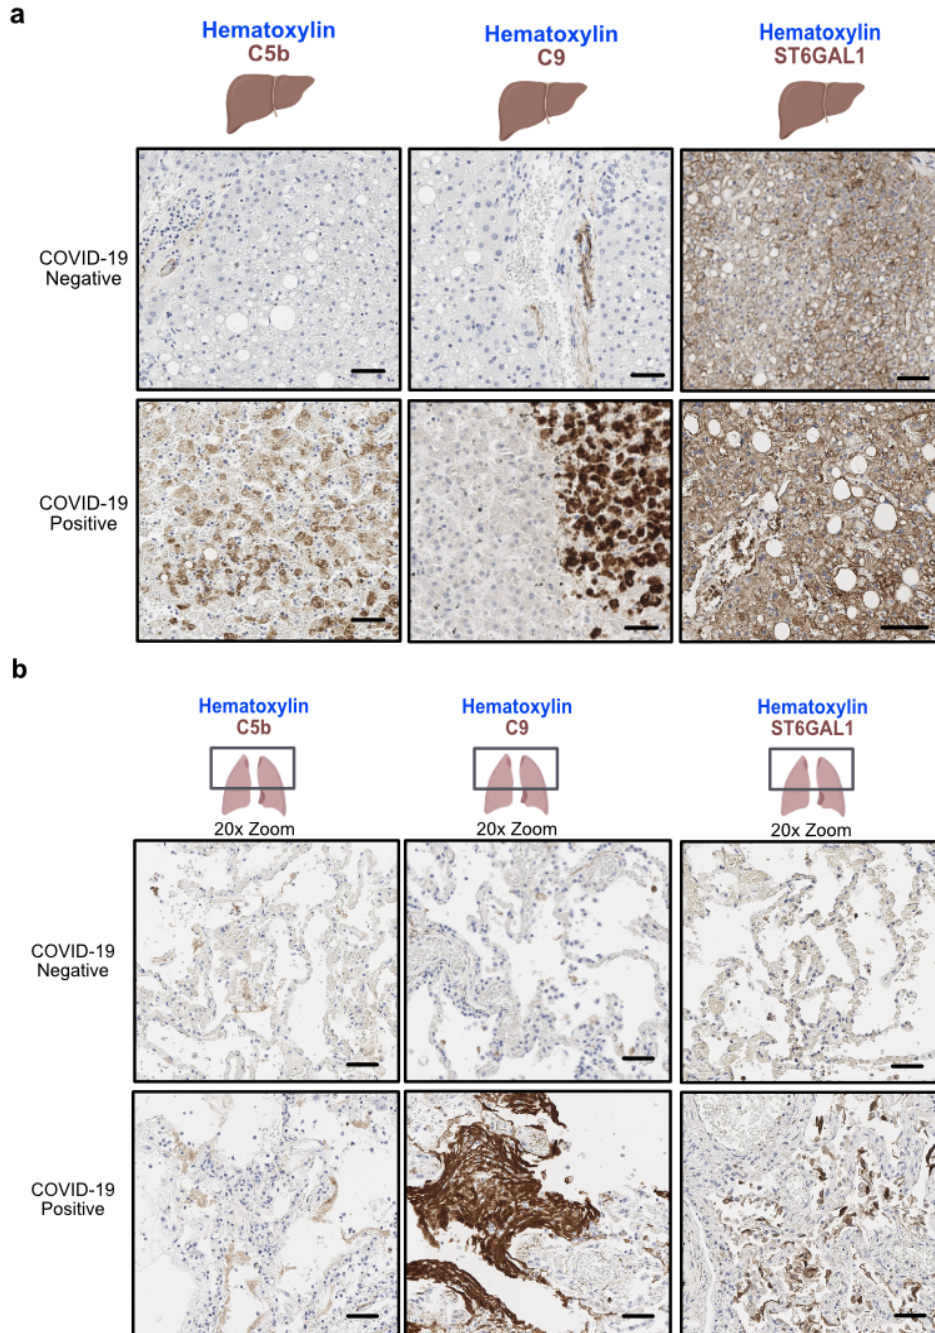

**Supplemental Figure 8. Complement and ST6GAL1 Expression in COVID-19 Autopsy Lungs and Livers.** **(a)** Representative images of IHC staining against complement C5b (left), C9 (middle) and ST6GAL1 (right) in the liver of COVID-19 negative (n = 2) or COVID-19 positive (n = 8) autopsy specimens. Scale bars represent 100  $\mu$ m. **(b)** Representative images of IHC staining against complement C5b (left), C9 (middle) and ST6GAL1 (right) in the upper lobe of COVID-19 negative (n = 2) or COVID-19 positive (n = 8) autopsy specimens.

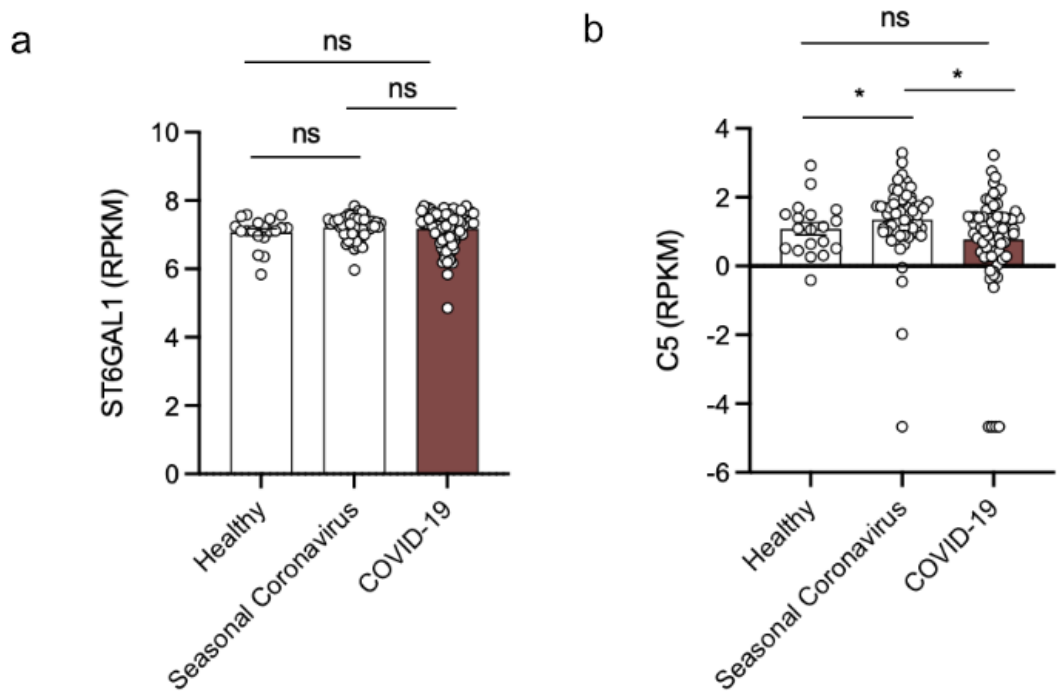

**Supplemental Figure 9. ST6GAL1 and C5 Expression on Whole Blood RNA Sequencing in COVID-19 and Seasonal Coronavirus.** ST6GAL1 **(a)** and C5 **(b)** mRNA expression in whole blood of healthy controls (n = 19) or those with seasonal coronavirus (n = 59), or COVID-19 (n = 46), from Gene Expression Omnibus: GSE161731.

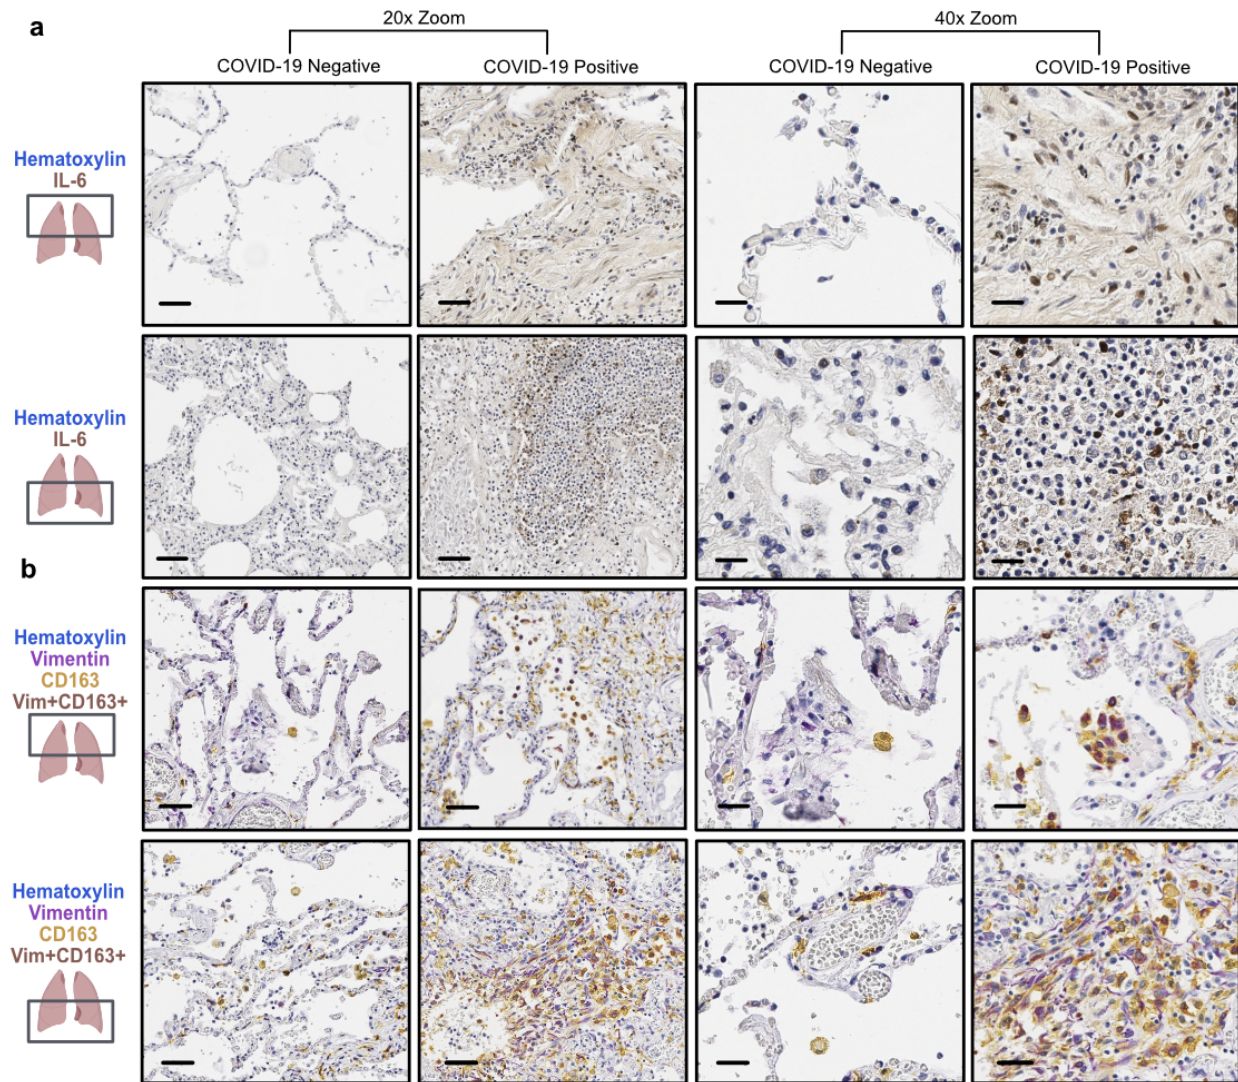

**Supplemental Figure 10. IL-6<sup>+</sup> and CD163<sup>+</sup>Vimentin<sup>+</sup> Cells Enriched in Lower Lobe of Lungs of COVID-19 Positive Autopsy Samples.** (a) Representative images of IHC staining against IL-6 in the lower lobe of the lung of COVID-19 negative (n = 2) or COVID-19 positive (n = 8) autopsy specimens. Scale bars represent 100  $\mu$ m on left, and 50  $\mu$ m on right, throughout. (b) Representative images of multi-chromogenic IHC staining against vimentin (purple), CD163 (yellow), and hematoxylin (blue) showing double positive cells in brown in the lower lobe of the lung in COVID-19 negative (n = 2) or COVID-19 positive (n = 8) autopsy specimens (left). Scale bars represent 100  $\mu$ m on left, and 50  $\mu$ m on right, throughout.

**Supplementary Table 1. Descriptive Characteristics of Cohorts for COVID-19 Negative and COVID-19 Positive Plasma Samples**

|                                                          | <b>COVID-19 Positive (n=71)</b>                                    | <b>COVID-19 Negative (n=60)</b> |
|----------------------------------------------------------|--------------------------------------------------------------------|---------------------------------|
| <b>Male/Female (ratio)</b>                               | 39/30 (1.30)                                                       | 35/25 (1.40)                    |
| <b>Median Age in Years (IQR)</b>                         | 61 (50-73)                                                         | 61 (50-71)                      |
| <b>Collection Date Ranges<br/>in YYYY/MM-YYYY/MM (n)</b> | 2020/07-2020/09 (2)<br>2020/10-2021/01 (64)<br>2021/02-2021/04 (5) | 2019/09-2019/10 (60)            |

**Note:**

- (1) The gender information of 2 participants of the COVID-19 positive cohort is not available.
- (2) The age information of 2 participants of the COVID-19 positive cohort is not available.

**Supplementary Table 2. Patient Characteristics for COVID-19 Negative and COVID-19 Positive Autopsy Samples**

| Patient | Age:  | Gender: | COVID -19 Status: | Diagnoses:                                                              | Pulmonary Pathology (Y/N) |
|---------|-------|---------|-------------------|-------------------------------------------------------------------------|---------------------------|
| 1       | 50-60 | Male    | Negative          | -DAD; pleural effusion<br>-MI; hypertrophy<br>-Cirrhosis, Hep C+        | Y                         |
| 2       | 60-70 | Male    | Negative          | -Subarachnoid Hemorrhage,<br>internal carotid artery dissection         | N                         |
| 3       | 0-10  | Female  | Negative          | -GBM<br>-Aspiration pneumonia (Staph Aureus)<br>-Cardiomegaly           | Y                         |
| 4       | 70-80 | Female  | Negative          | -DAD<br>-MI; coronary artery disease                                    | Y                         |
| 5       | 70-80 | Female  | Negative          | -CHF<br>-intra-abdominal hemorrhage<br>-CKD; pneumonia                  | Y                         |
| 6       | 70-80 | Female  | Negative          | -DAD; pulmonary infarcts, lung congestion**                             | Y                         |
| 7       | 40-50 | Male    | Negative          | -Cor pulmonale due to pericarditis and hemorrhage;<br>-pulmonary emboli | Y                         |
| 8       | 60-70 | Male    | Negative          | -pleural fluid<br>-Coronary artery disease<br>-hepatomegaly             | N                         |
| 9       | 70-80 | Male    | Negative          | -Disseminated intravascular coagulation to sepsis<br>-DAD; cardiomegaly | Y                         |
| 9       | 70-80 | Male    | Negative          | -Hypovolemic shock<br>-CHF<br>-pulmonary edema with pleural effusions   | Y                         |
| 10      | 60-70 | Female  | Positive          | -COPD, lung cancer                                                      | Y                         |
| 11      | 50-60 | Female  | Positive          | N/A                                                                     | Y                         |
| 12      | 70-80 | Female  | Positive          | -Coronary artery disease, adrenal adenoma<br>-COPD                      | Y                         |
| 13      | 60-70 | Female  | Positive          | -Renal cell carcinoma, partial nephrectomy<br>-DAD                      | Y                         |
| 14      | 60-70 | Male    | Positive          | -CAD<br>-acute MI                                                       | Y                         |
| 15      | 50-60 | Female  | Positive          | -Hyperthyroidism<br>-DAD                                                | Y                         |
| 16      | 40-50 | Male    | Positive          | -DAD<br>-Acute Kidney Injury                                            | Y                         |
| 17      | 60-70 | Male    | Positive          | -Cirrhosis, CKD<br>-PVD                                                 | Y                         |

Key: DAD = Diffuse Alveolar Damage; MI = myocardial ischemia; CHF = congestive heart failure; CKD = chronic kidney disease; CAD = coronary artery disease

\*\*Autopsy Limited to Lungs Only.

**Supplementary Table 3. Microarray Lectin List for Plasma Analysis**

| Lectin/Antibody     | Supplier                    | Species of Origin              | Printing concentration. (mg/ml) | Inhibiting Sugar* |
|---------------------|-----------------------------|--------------------------------|---------------------------------|-------------------|
| ACA                 | EY                          | <i>Amaranthus caudatus</i>     | 2.0                             | GlcNAc            |
| AIA                 | EY                          | <i>Artocarpus integrifolia</i> | 2.0                             | Gal               |
| AIA                 | Vector (lot#1)              | <i>Artocarpus integrifolia</i> | 2.0                             | Gal               |
| AIA v2              | Vector (lot#2)              | <i>Artocarpus integrifolia</i> | 2.0                             | Gal               |
| AIA                 | GlycoMatrix                 | <i>Artocarpus integrifolia</i> | 1.5                             | Fuc               |
| Anti Lewis A        | Abcam                       | /                              | as received                     | /                 |
| Anti Lewis B        | Sigma                       | /                              | as received                     | /                 |
| Anti O-GlcNAc       | Thermo Fisher               | /                              | as received                     | /                 |
| Anti PolySia        | Absolute Antibody           | /                              | as received                     | /                 |
| Anti PSGL-1         | Sigma                       | /                              | as received                     | /                 |
| Anti Sialyl Lewis X | GeneTex                     | /                              | as received                     | /                 |
| Anti VCAM-1         | Sigma                       | /                              | as received                     | /                 |
| Anti VE cadherin    | Thermo Fisher               | /                              | as received                     | /                 |
| AOL                 | TCI America                 | <i>Aspergillus oryzae</i>      | 2.0                             | Fuc               |
| BamBL               | <i>Burkholderia cepacia</i> | expressed in-house             | 1.5                             | Fuc               |
| BanLec H84T         | UAlberta                    | <i>Musa paradisiaca</i>        | 1.0                             | Man               |
| BPL                 | Vector                      | <i>Bauhinia purpurea</i>       | 2.0                             | Gal               |
| ConA                | Sigma                       | <i>Canavalia ensiformis</i>    | 2.0                             | Man               |
| ConA                | Vector                      | <i>Canavalia ensiformis</i>    | 2.0                             | Man               |
| diCBM40             | UAlberta                    | <i>Clostridium perfringens</i> | 1.5                             | Lac               |
| DSA                 | Vector                      | <i>Datura stramonium</i>       | 2.0                             | Lac               |
| ECA                 | Vector                      | <i>Erythrina cristagalli</i>   | 2.0                             | GlcNAc            |
| LcH                 | Aniara (lot #1)             | <i>Lens culinaris</i>          | 1.5                             | Man               |
| LcH                 | Aniara (lot #2)             | <i>Lens culinaris</i>          | 1.5                             | Man               |
| LcH                 | EY                          | <i>Lens culinaris</i>          | 2.0                             | Man               |
| LEL                 | Vector                      | <i>Lycopersicon esculentum</i> | 2.0                             | GlcNAc            |
| MNA-M               | EY                          | <i>Morniga M</i>               | 2.0                             | Man               |
| MPL                 | Vector                      | <i>Machura pomifera</i>        | 2.0                             | Gal               |
| PHA-E               | EY                          | <i>Phaseolus vulgaris</i>      | 2.0                             | GlcNAc            |
| PHA-E               | Vector                      | <i>Phaseolus vulgaris</i>      | 2.0                             | GlcNAc            |
| PHA-L               | EY                          | <i>Phaseolus vulgaris</i>      | 2.0                             | GlcNAc            |
| Protein A           | Thermo Fisher               | /                              | 0.5                             | /                 |
| Protein G           | Thermo Fisher               | /                              | 1.0                             | /                 |
| PSA                 | Vector                      | <i>Pisum sativum</i>           | 2.0                             | Man               |
| RCA120              | Vector                      | <i>Ricinus communis</i>        | 2.0                             | Gal               |
| SLBR-B              | UAlberta                    | <i>Streptococcus gordonii</i>  | 2.3                             | Lac               |
| SLBR-H              | UAlberta                    | <i>Streptococcus gordonii</i>  | 2.0                             | Lac               |
| SLBR-N              | UAlberta                    | <i>Streptococcus gordonii</i>  | 2.0                             | Lac               |
| SNA                 | Vector                      | <i>Sambucus nigra</i>          | 2.0                             | Lac               |
| STL                 | Vector                      | <i>Solanum tuberosum</i>       | 2.0                             | GlcNAc            |
| TJA-II              | Aniara                      | <i>Trichosanthes japonica</i>  | 2.0                             | Lac               |
| WGA                 | Vector                      | <i>Triticum vulgare</i>        | 2.0                             | GlcNAc            |

\*Inhibiting sugars: Man, mannose; Gal, galactose; Fuc, fucose; GlcNAc, N-acetylglucosamine; Lac, lactose.

**Supplementary Table 4. Microarray Lectin List for Autopsy Sample Analysis**

| Lectin/Antibody     | Supplier          | Species of Origin                  | Printing concentration. (mg/ml) | Inhibiting Sugar* |
|---------------------|-------------------|------------------------------------|---------------------------------|-------------------|
| AAL                 | Vector            | <i>Aleuria aurantia</i>            | 1.5                             | Fuc               |
| ACA                 | EY                | <i>Amaranthus caudatus</i>         | 2.0                             | GlcNAc            |
| AIA                 | EY                | <i>Artocarpus integrifolia</i>     | 2.0                             | Gal               |
| AIA                 | Vector            | <i>Artocarpus integrifolia</i>     | 2.0                             | Gal               |
| AIA                 | GlycoMatrix       | <i>Artocarpus integrifolia</i>     | 1.5                             | Fuc               |
| AMA                 | EY                | <i>Arum maculatum</i>              | 2.0                             | Man               |
| Anti CL-K1 (CL-11)  | LSBio             | /                                  | as received                     | /                 |
| Anti CL-L1 (CL-10)  | LSBio             | /                                  | as received                     | /                 |
| Anti D-dimer        | Thermo Fisher     | /                                  | as received                     | /                 |
| Anti Ficolin-1      | LSBio             | /                                  | as received                     | /                 |
| Anti Ficolin-3      | LSBio             | /                                  | as received                     | /                 |
| Anti Galectin 1     | Abcam             | /                                  | as received                     | /                 |
| Anti Galectin 9     | R&D Systems       | /                                  | as received                     | /                 |
| Anti H1             | Thermo Fisher     | /                                  | as received                     | /                 |
| Anti ICAM-1         | Thermo Fisher     | /                                  | as received                     | /                 |
| Anti IgM            | Abcam             | /                                  | as received                     | /                 |
| Anti Lewis A        | Abcam             | /                                  | as received                     | /                 |
| Anti Lewis B        | Sigma             | /                                  | as received                     | /                 |
| Anti Lewis Y        | Abcam             | /                                  | as received                     | /                 |
| Anti MASP-1         | Abcam             | /                                  | as received                     | /                 |
| Anti NEU1           | Thermo Fisher     | /                                  | as received                     | /                 |
| Anti P-selectin     | Thermo Fisher     | /                                  | as received                     | /                 |
| Anti PolySia        | Absolute Antibody | /                                  | as received                     | /                 |
| Anti PSGL-1         | Sigma             | /                                  | as received                     | /                 |
| Anti Sialyl Lewis X | GeneTex           | /                                  | as received                     | /                 |
| Anti VCAM-1         | Sigma             | /                                  | as received                     | /                 |
| Anti VE cadherin    | Thermo Fisher     | /                                  | as received                     | /                 |
| AOL                 | TCI America       | <i>Aspergillus oryzae</i>          | 2.0                             | Fuc               |
| BanLec H84T         | UAlberta          | <i>Musa paradisiaca</i>            | 1.0                             | Man               |
| Blackbean           | EY                | <i>Phaseolus vulgaris</i>          | 2.0                             | Lac               |
| BPL                 | Vector            | <i>Bauhinia purpurea</i>           | 2.0                             | Gal               |
| ConA                | Sigma             | <i>Canavalia ensiformis</i>        | 2.0                             | Man               |
| DBA                 | Vector            | <i>Dolichos Biflorus</i>           | 2.0                             | Gal               |
| diCBM40             | UAlberta          | <i>Clostridium perfringens</i>     | 1.5                             | Lac               |
| DSA                 | Vector            | <i>Datura stramonium</i>           | 2.0                             | Lac               |
| ECA                 | Vector            | <i>Erythrina cristagalli</i>       | 2.0                             | GlcNAc            |
| Griffithsin         | UAlberta          | <i>Griffithsia</i>                 | 1.7                             | Man               |
| LcH                 | Vector            | <i>Lens culinaris</i>              | 1.5                             | Man               |
| LcH                 | EY                | <i>Lens culinaris</i>              | 2.0                             | Man               |
| LEL                 | Vector            | <i>Lycopersicon esculentum</i>     | 2.0                             | GlcNAc            |
| LTL Lotus           | Vector            | <i>Lotus tetragonolobus</i>        | 2.0                             | Fuc               |
| MAA                 | Sigma             | <i>Maachia amurensis</i>           | 2.0                             | Lac               |
| MAA-I               | Vector            | <i>Maachia amurensis</i>           | 2.0                             | Lac               |
| MAA-II              | Vector            | <i>Maachia amurensis</i>           | 1.0                             | Lac               |
| MNA-G               | EY                | <i>Morniga G</i>                   | 2.0                             | Gal               |
| MNA-M               | EY                | <i>Morniga M</i>                   | 2.0                             | Man               |
| MPL                 | Vector            | <i>Machura pomifera</i>            | 2.0                             | Gal               |
| PHA-E               | EY                | <i>Phaseolus vulgaris</i>          | 2.0                             | GlcNAc            |
| Protein G           | Thermo Fisher     | /                                  | 1.0                             | /                 |
| PSA                 | Vector            | <i>Pisum sativum</i>               | 2.0                             | Man               |
| PSA                 | GlycoMatrix       | <i>Pisum sativum</i>               | 2.0                             | Man               |
| PTA Gal             | EY                | <i>Psophocarpus tetragonolobus</i> | 2.0                             | Gal               |
| PTA GalNAc          | EY                | <i>Psophocarpus tetragonolobus</i> | 2.0                             | Gal               |
| RCA120              | Vector            | <i>Ricinus communis</i>            | 2.0                             | Gal               |
| SBA                 | Vector            | <i>Glycine max</i>                 | 2.0                             | Gal               |

|        |          |                               |     |        |
|--------|----------|-------------------------------|-----|--------|
| SLBR-B | UAlberta | <i>Streptococcus gordonii</i> | 2.3 | Lac    |
| SLBR-H | UAlberta | <i>Streptococcus gordonii</i> | 2.0 | Lac    |
| SLBR-N | UAlberta | <i>Streptococcus gordonii</i> | 2.0 | Lac    |
| SNA    | Vector   | <i>Sambucus nigra</i>         | 2.0 | Lac    |
| SNA    | Sigma    | <i>Sambucus nigra</i>         | 2.0 | Lac    |
| SNA-I  | EY       | <i>Sambucus nigra</i>         | 2.0 | Lac    |
| STL    | Vector   | <i>Solanum tuberosum</i>      | 2.0 | GlcNAc |
| TJA-II | Aniara   | <i>Trichosanthes japonica</i> | 2.0 | Lac    |
| TL     | EY       | <i>Tulipa sp.</i>             | 2.0 | GlcNAc |
| UEA-I  | EY       | <i>Ulex europaeus</i>         | 2.0 | Fuc    |
| UEA-II | EY       | <i>Ulex europaeus</i>         | 2.0 | GlcNAc |
| WFA    | Vector   | <i>Wisteria floribunda</i>    | 2.0 | Gal    |
| WGA    | Vector   | <i>Triticum vulgare</i>       | 2.0 | GlcNAc |

\*Inhibiting sugars: Man, mannose; Gal, galactose; Fuc, fucose; GlcNAc, N-acetylglucosamine; Lac, lactose.



**Supplementary Table 5.** Proteins in SNA-enriched Severe COVID-19 Plasma

| Protein Name                                     | UniProt Entry Name | Accession  | Average Number of Spectral Matches |
|--------------------------------------------------|--------------------|------------|------------------------------------|
| Fibrinogen beta chain                            | FIBB_HUMAN         | P02675     | 496                                |
| Fibrinogen alpha chain                           | FIBA_HUMAN         | P02671     | 292                                |
| Fibrinogen gamma chain                           | FIBG_HUMAN         | P02679     | 264                                |
| Complement C3                                    | CO3_HUMAN          | P01024     | 236                                |
| Apolipoprotein B-100                             | APOB_HUMAN         | P04114     | 193                                |
| Alpha-1-antitrypsin                              | A1AT_HUMAN         | P01009     | 157                                |
| Alpha-2-macroglobulin                            | A2MG_HUMAN         | P01023     | 141                                |
| Fibrinogen gamma chain (Fragment)                | C9JPQ9_HUMAN       | C9JPQ9     | 136                                |
| Complement factor H                              | CFAH_HUMAN         | P08603     | 125                                |
| Plasminogen                                      | PLMN_HUMAN         | P00747     | 81                                 |
| Hemopexin                                        | HEMO_HUMAN         | P02790     | 73                                 |
| Immunoglobulin kappa constant                    | IGKC_HUMAN         | P01834     | 67                                 |
| Alpha-1-antichymotrypsin                         | AACT_HUMAN         | P01011     | 55                                 |
| Prothrombin                                      | THRB_HUMAN         | P00734     | 51                                 |
| Immunoglobulin heavy constant mu                 | IGHM_HUMAN         | P01871     | 45                                 |
| Inter-alpha-trypsin inhibitor heavy chain H4     | ITIH4_HUMAN        | Q14624     | 45                                 |
| Apolipoprotein A-IV                              | APOA4_HUMAN        | P06727     | 39                                 |
| Immunoglobulin heavy constant alpha 2 (Fragment) | A0A0G2JMB2_HUMAN   | A0A0G2JMB2 | 36                                 |
| C3/C5 convertase                                 | B4E1Z4_HUMAN       | B4E1Z4     | 36                                 |
| Fibronectin                                      | FINC_HUMAN         | P02751     | 36                                 |
| Complement component C9                          | CO9_HUMAN          | P02748     | 29                                 |
| Apolipoprotein E                                 | APOE_HUMAN         | P02649     | 26                                 |
| Vitronectin                                      | VTNC_HUMAN         | P04004     | 24                                 |
| Complement component C6                          | CO6_HUMAN          | P13671     | 24                                 |
| Clusterin                                        | CLUS_HUMAN         | P10909     | 23                                 |
| Alpha-1B-glycoprotein                            | A1BG_HUMAN         | P04217     | 23                                 |
| Complement C4-A                                  | CO4A_HUMAN         | P0COL4     | 22                                 |
| Leucine-rich alpha-2-glycoprotein                | A2GL_HUMAN         | P02750     | 20                                 |
| Complement C5                                    | CO5_HUMAN          | P01031     | 19                                 |
| Complement factor H                              | A0A0D9SG88_HUMAN   | A0A0D9SG88 | 19                                 |
| Gelsolin                                         | GELS_HUMAN         | P06396     | 18                                 |
| Thrombospondin-1                                 | TSP1_HUMAN         | P07996     | 18                                 |
| Lipopolysaccharide-binding protein               | LBP_HUMAN          | P18428     | 17                                 |
| Hemoglobin subunit alpha                         | HBA_HUMAN          | P69905     | 17                                 |
| Alpha-2-HS-glycoprotein                          | FETUA_HUMAN        | P02765     | 16                                 |
| Centrosomal protein of 290 kDa (Fragment)        | A0A5K1VW81_HUMAN   | A0A5K1VW81 | 16                                 |
| Inter-alpha-trypsin inhibitor heavy chain H1     | ITIH1_HUMAN        | P19827     | 15                                 |
| Complement subcomponent C1r                      | A0A3B3ISR2_HUMAN   | A0A3B3ISR2 | 13                                 |
| Complement component 8 subunit beta              | F5GY80_HUMAN       | F5GY80     | 13                                 |
| Alpha-2-antiplasmin                              | A2AP_HUMAN         | P08697     | 13                                 |
| Immunoglobulin lambda constant 2                 | IGLC2_HUMAN        | P0DOY2     | 13                                 |
| Complement factor I                              | G3XAM2_HUMAN       | G3XAM2     | 12                                 |
| Pregnancy zone protein                           | PZP_HUMAN          | P20742     | 12                                 |
| Serum amyloid P-component                        | SAMP_HUMAN         | P02743     | 11                                 |
| Integrin alpha-IIb                               | ITA2B_HUMAN        | P08514     | 10                                 |
| Complement component C7                          | CO7_HUMAN          | P10643     | 10                                 |
| Complement component C8 gamma chain              | CO8G_HUMAN         | P07360     | 9                                  |
| Uncharacterized protein C9orf43                  | CI043_HUMAN        | Q8TAL5     | 9                                  |
| Platelet factor 4                                | PLF4_HUMAN         | P02776     | 9                                  |
| Complement component C8 alpha chain              | CO8A_HUMAN         | P07357     | 9                                  |
| Complement factor H-related protein 2            | V9GYE7_HUMAN       | V9GYE7     | 9                                  |
| Fermitin family homolog 3                        | URP2_HUMAN         | Q86UX7     | 9                                  |
| Afamin                                           | AFAM_HUMAN         | P43652     | 8                                  |
| Angiotensinogen                                  | A0A7P0T9S6_HUMAN   | A0A7P0T9S6 | 7                                  |

|                                                                        |                  |            |   |
|------------------------------------------------------------------------|------------------|------------|---|
| C-reactive protein                                                     | CRP_HUMAN        | P02741     | 6 |
| Carboxypeptidase N catalytic chain                                     | CBPN_HUMAN       | P15169     | 6 |
| Ficolin-3                                                              | FCN3_HUMAN       | O75636     | 5 |
| Pigment epithelium-derived factor                                      | PEDF_HUMAN       | P36955     | 5 |
| Plasma kallikrein                                                      | KLKB1_HUMAN      | P03952     | 5 |
| Pleckstrin                                                             | PLEK_HUMAN       | P08567     | 5 |
| Apolipoprotein L1                                                      | APOL1_HUMAN      | O14791     | 4 |
| Plasma serine protease inhibitor                                       | IPSP_HUMAN       | P05154     | 4 |
| Thyroxine-binding globulin                                             | THBG_HUMAN       | P05543     | 4 |
| Coagulation factor V                                                   | FA5_HUMAN        | P12259     | 3 |
| 2-phospho-D-glycerate hydro-lyase                                      | A0A2R8Y6G6_HUMAN | A0A2R8Y6G6 | 3 |
| Potassium voltage-gated channel subfamily H member 1                   | A0A0S1TJ81_HUMAN | A0A0S1TJ81 | 3 |
| N-acetylmuramoyl-L-alanine amidase                                     | PGRP2_HUMAN      | Q96PD5     | 3 |
| Immunoglobulin lambda-like polypeptide 5                               | IGLL5_HUMAN      | B9A064     | 3 |
| Integrin beta (Fragment)                                               | H3BM21_HUMAN     | H3BM21     | 3 |
| Apolipoprotein C-II                                                    | APOC2_HUMAN      | P02655     | 3 |
| Centromere-associated protein E                                        | A0A087X0P0_HUMAN | A0A087X0P0 | 2 |
| Corticosteroid-binding globulin (Fragment)                             | G3V4V7_HUMAN     | G3V4V7     | 2 |
| Beta-2-microglobulin                                                   | B2MG_HUMAN       | P61769     | 2 |
| Ig-like domain-containing protein (Fragment)                           | A0A0J9YY99_HUMAN | A0A0J9YY99 | 2 |
| Protein ITPRID2                                                        | E7EUL7_HUMAN     | E7EUL7     | 2 |
| Protein mono-ADP-ribosyltransferase PARP6 (Fragment)                   | H3BUQ6_HUMAN     | H3BUQ6     | 2 |
| Insulin-like growth factor-binding protein complex acid labile subunit | ALS_HUMAN        | P35858     | 2 |

**Supplementary Table 6.** Proteins in SNA-enriched Mild COVID-19 Plasma

| Protein Name                                 | UniProt Entry Name | Accession  | Average Number of Spectral Matches |
|----------------------------------------------|--------------------|------------|------------------------------------|
| Fibrinogen gamma chain                       | FIBG_HUMAN         | P02679     | 25                                 |
| Complement C3                                | CO3_HUMAN          | P01024     | 189                                |
| Apolipoprotein B-100                         | APOB_HUMAN         | P04114     | 171                                |
| Haptoglobin                                  | HPT_HUMAN          | P00738     | 108                                |
| Alpha-1-antitrypsin                          | A1AT_HUMAN         | P01009     | 137                                |
| Alpha-2-macroglobulin                        | A2MG_HUMAN         | P01023     | 243                                |
| Complement factor H                          | CFAH_HUMAN         | P08603     | 104                                |
| Haptoglobin-related protein                  | HPTR_HUMAN         | P00739     | 70                                 |
| Plasminogen                                  | PLMN_HUMAN         | P00747     | 39                                 |
| Hemopexin                                    | HEMO_HUMAN         | P02790     | 97                                 |
| Alpha-1-antichymotrypsin                     | AACT_HUMAN         | P01011     | 35                                 |
| Kininogen-1                                  | KNG1_HUMAN         | P01042     | 53                                 |
| Immunoglobulin heavy constant mu             | IGHM_HUMAN         | P01871     | 60                                 |
| Inter-alpha-trypsin inhibitor heavy chain H4 | ITIH4_HUMAN        | Q14624     | 43                                 |
| Antithrombin-III                             | ANT3_HUMAN         | P01008     | 49                                 |
| Apolipoprotein E                             | APOE_HUMAN         | P02649     | 14                                 |
| Serum amyloid A-1 protein                    | SAA1_HUMAN         | P0DJ18     | 2                                  |
| Complement factor H-related protein 1        | FHR1_HUMAN         | Q03591     | 19                                 |
| Lipopolysaccharide-binding protein           | LBP_HUMAN          | P18428     | 11                                 |
| Hemoglobin subunit alpha                     | HBA_HUMAN          | P69905     | 17                                 |
| Alpha-2-HS-glycoprotein                      | FETUA_HUMAN        | P02765     | 27                                 |
| SAA2-SAA4 readthrough                        | A0A096LPE2_HUMAN   | A0A096LPE2 | 8                                  |
| Inter-alpha-trypsin inhibitor heavy chain H1 | ITIH1_HUMAN        | P19827     | 12                                 |
| Alpha-2-antiplasmin                          | A2AP_HUMAN         | P08697     | 10                                 |
| Complement factor I                          | G3XAM2_HUMAN       | G3XAM2     | 10                                 |
| Pregnancy zone protein                       | PZP_HUMAN          | P20742     | 16                                 |
| Heparin cofactor 2                           | HEP2_HUMAN         | P05546     | 10                                 |
| Serum paraoxonase/arylesterase 1             | PON1_HUMAN         | P27169     | 5                                  |
| Afamin                                       | AFAM_HUMAN         | P43652     | 23                                 |
| Plasma kallikrein                            | KLKB1_HUMAN        | P03952     | 7                                  |
| Apolipoprotein L1                            | APOL1_HUMAN        | O14791     | 4                                  |
| Plasma serine protease inhibitor             | IPSP_HUMAN         | P05154     | 3                                  |
| Thyroxine-binding globulin                   | THBG_HUMAN         | P05543     | 5                                  |
| Immunoglobulin lambda-like polypeptide 5     | IGLL5_HUMAN        | B9A064     | 5                                  |
| Apolipoprotein C-II                          | APOC2_HUMAN        | P02655     | 4                                  |
| Beta-2-microglobulin                         | B2MG_HUMAN         | P61769     | 2                                  |
| Ig-like domain-containing protein (Fragment) | A0A0J9YY99_HUMAN   | A0A0J9YY99 | 5                                  |
| Protein ITPRID2                              | E7EUL7_HUMAN       | E7EUL7     | 3                                  |

**Supplementary Table 7.** Upregulated Proteins in SNA-enriched Severe COVID-19 Plasma

| Protein Name                                                           | UniProt Entry Name | Accession  | Average Number of Spectral Matches (Severe) | Average Number of Spectral Matches (Mild) |
|------------------------------------------------------------------------|--------------------|------------|---------------------------------------------|-------------------------------------------|
| Fibrinogen beta chain                                                  | FIBB_HUMAN         | P02675     | 496                                         | 115                                       |
| Fibrinogen alpha chain                                                 | FIBA_HUMAN         | P02671     | 292                                         | 91                                        |
| Fibrinogen gamma chain                                                 | FIBG_HUMAN         | P02679     | 264                                         | 25                                        |
| Haptoglobin                                                            | HPT_HUMAN          | P00738     | 165                                         | 108                                       |
| Fibrinogen gamma chain (Fragment)                                      | C9JQP9_HUMAN       | C9JQP9     | 136                                         | 0                                         |
| Haptoglobin-related protein                                            | HPTR_HUMAN         | P00739     | 91                                          | 70                                        |
| Plasminogen                                                            | PLMN_HUMAN         | P00747     | 81                                          | 39                                        |
| Alpha-1-antichymotrypsin                                               | AACT_HUMAN         | P01011     | 55                                          | 35                                        |
| Prothrombin                                                            | THRB_HUMAN         | P00734     | 51                                          | 0                                         |
| Complement component C9                                                | CO9_HUMAN          | P02748     | 29                                          | 4                                         |
| Apolipoprotein E                                                       | APOE_HUMAN         | P02649     | 26                                          | 14                                        |
| Vitronectin                                                            | VTNC_HUMAN         | P04004     | 24                                          | 9                                         |
| Complement component C6                                                | CO6_HUMAN          | P13671     | 24                                          | 2                                         |
| Serum amyloid A-1 protein                                              | SAA1_HUMAN         | P0DJ18     | 24                                          | 2                                         |
| Clusterin                                                              | CLUS_HUMAN         | P10909     | 23                                          | 12                                        |
| Complement C4-A                                                        | CO4A_HUMAN         | P0C0L4     | 22                                          | 0                                         |
| Complement C5                                                          | CO5_HUMAN          | P01031     | 19                                          | 3                                         |
| Complement factor H                                                    | A0A0D9SG88_HUMAN   | A0A0D9SG88 | 19                                          | 0                                         |
| Gelsolin                                                               | GELS_HUMAN         | P06396     | 18                                          | 4                                         |
| Thrombospondin-1                                                       | TSP1_HUMAN         | P07996     | 18                                          | 3                                         |
| Centrosomal protein of 290 kDa (Fragment)                              | A0A5K1VW81_HUMAN   | A0A5K1VW81 | 16                                          | 5                                         |
| Inter-alpha-trypsin inhibitor heavy chain H1                           | ITI1_HUMAN         | P19827     | 15                                          | 12                                        |
| Complement subcomponent C1r                                            | A0A3B3ISR2_HUMAN   | A0A3B3ISR2 | 13                                          | 0                                         |
| Complement component 8 subunit beta                                    | F5GY80_HUMAN       | F5GY80     | 13                                          | 1                                         |
| Serum amyloid P-component                                              | SAMP_HUMAN         | P02743     | 11                                          | 5                                         |
| Integrin alpha-11b                                                     | ITA2B_HUMAN        | P08514     | 10                                          | 0                                         |
| Complement component C7                                                | CO7_HUMAN          | P10643     | 10                                          | 2                                         |
| Complement component C8 gamma chain                                    | CO8G_HUMAN         | P07360     | 9                                           | 1                                         |
| Uncharacterized protein C9orf43                                        | CI043_HUMAN        | Q8TAL5     | 9                                           | 0                                         |
| Complement component C8 alpha chain                                    | CO8A_HUMAN         | P07357     | 9                                           | 1                                         |
| Complement factor H-related protein 2                                  | V9GYE7_HUMAN       | V9GYE7     | 9                                           | 0                                         |
| Fermitin family homolog 3                                              | URP2_HUMAN         | Q86UX7     | 9                                           | 0                                         |
| Angiotensinogen                                                        | A0A7P0T9S6_HUMAN   | A0A7P0T9S6 | 7                                           | 0                                         |
| C-reactive protein                                                     | CRP_HUMAN          | P02741     | 6                                           | 0                                         |
| Carboxypeptidase N catalytic chain                                     | CBPN_HUMAN         | P15169     | 6                                           | 0                                         |
| Ficolin-3                                                              | FCN3_HUMAN         | O75636     | 5                                           | 1                                         |
| Pigment epithelium-derived factor                                      | PEDF_HUMAN         | P36955     | 5                                           | 0                                         |
| Pleckstrin                                                             | PLEK_HUMAN         | P08567     | 5                                           | 0                                         |
| Coagulation factor V                                                   | FA5_HUMAN          | P12259     | 3                                           | 0                                         |
| Potassium voltage-gated channel subfamily H member 1                   | A0A0S1TJ81_HUMAN   | A0A0S1TJ81 | 3                                           | 0                                         |
| Integrin beta (Fragment)                                               | H3BM21_HUMAN       | H3BM21     | 3                                           | 0                                         |
| Corticosteroid-binding globulin (Fragment)                             | G3V4V7_HUMAN       | G3V4V7     | 2                                           | 0                                         |
| Protein mono-ADP-ribosyltransferase PARP6 (Fragment)                   | H3BUQ6_HUMAN       | H3BUQ6     | 2                                           | 0                                         |
| Insulin-like growth factor-binding protein complex acid labile subunit | ALS_HUMAN          | P35858     | 2                                           | 0                                         |
